# Supplementary material for: C-terminal UBA domains protect ubiquitin receptors by preventing initiation of protein degradation
Source: PubMed Central journal article supplement — Nat Commun. 2011 Feb 8;2:191–. doi: 10.1038/ncomms1179 (PMC3105319; doi:10.1038/ncomms1179), 2011-02-08
Supplement: ncomms1179-s1.pdf [file ncomms1179-s1.pdf]

**C-terminal UBA Domains Protect Ubiquitin Receptors by Preventing Initiation of Protein Degradation**

Christian Heinen<sup>§</sup>, Klára Ács, Deborah Hoogstraten and Nico P. Dantuma<sup>\*</sup>

The Supplementary information contains:

Supplementary Figures S1 and S2

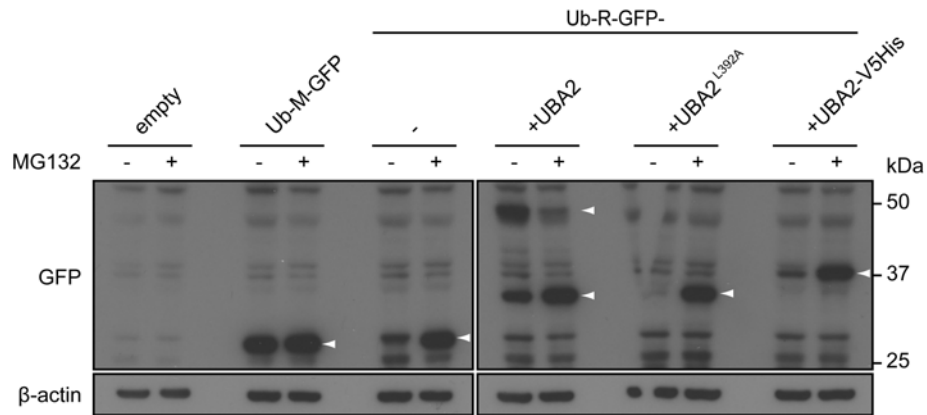

**Supplementary Figure S1.** C-terminal extensions abrogate the protective effect of the UBA2 domain. Steady-state levels of Ub-M-GFP, Ub-R-GFP, Ub-R-GFP-UBA2, Ub-R-GFP-UBA2<sup>L392A</sup>, and Ub-R-GFP-UBA2-V5His in the absence of presence of the proteasome inhibitor MG132. Fusions were detected by Western blotting with a GFP-specific antibody. Note that the upper band in the Ub-R-GFP-UBA2 corresponds with diubiquitylated Ub-R-GFP-UBA2<sup>Rad23</sup>.  $\beta$ -actin is shown as loading control. Molecular weight markers are indicated. Specific bands are indicated with arrowheads.

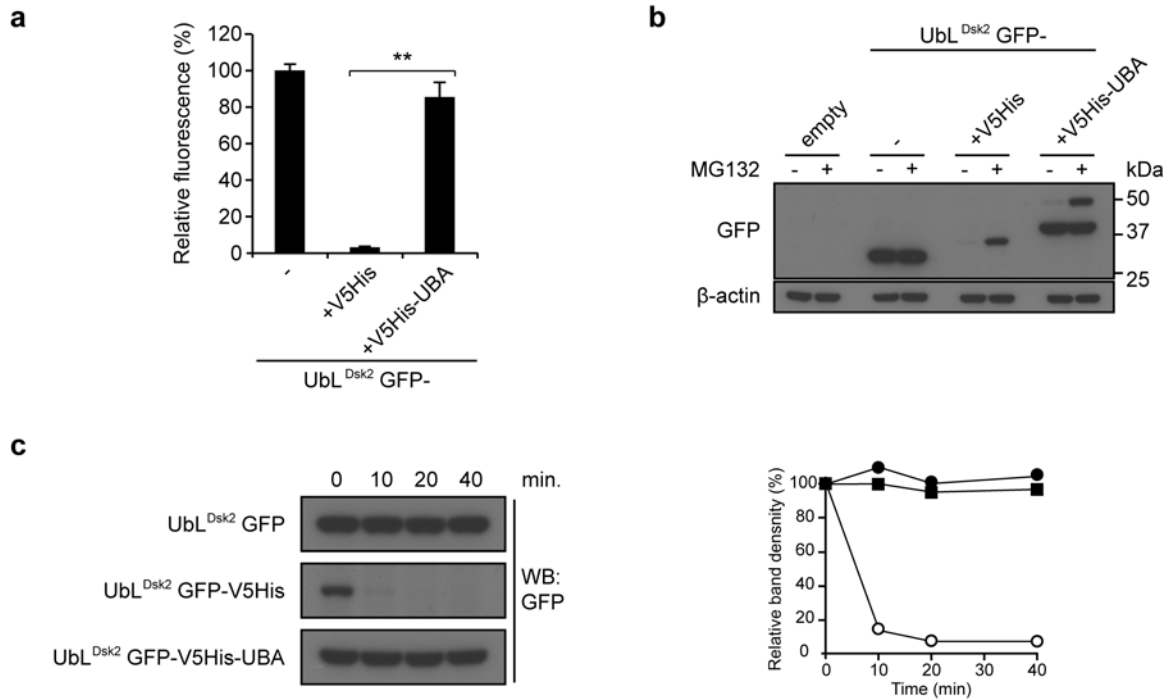

**Supplementary Figure S2.** Dsk2's C-terminal UBA domains can shield an internal unstructured polypeptide. **a)** Flow cytometric quantification of the mean fluorescence intensities of yeast expressing UbL<sup>Dsk2</sup>GFP, UbL<sup>Dsk2</sup>GFP-V5His, and UbL<sup>Dsk2</sup>GFP-V5His-UBA. UbL<sup>Dsk2</sup>GFP was standardized as 100%. Values are means and standard deviations (n=3). \*P<0.05, \*\*P<0.01 (Student's *t* test). **b)** Steady-state levels of UbL<sup>Dsk2</sup>GFP, UbL<sup>Dsk2</sup>GFP-V5His, and UbL<sup>Dsk2</sup>GFP-V5His-UBA in yeast expressed under the control of the GAL1 promoter without and with proteasome inhibitor MG132. β-actin is shown as loading control. Molecular weight markers are indicated. **c)** Turnover of UbL<sup>Dsk2</sup>GFP (closed circles), UbL<sup>Dsk2</sup>GFP-V5His (open circles), and UbL<sup>Dsk2</sup>GFP-V5His-UBA (closed squares). Samples were collected at the indicated time points and detected by Western blotting with a GFP-specific antibody. Densitometric quantification of the blot is shown to the right.
